# Supplementary material for: The enzyme-like catalytic hydrogen abstraction reaction mechanisms of cyclic hydrocarbons with magnesium-diluted Fe-MOF-74
Source: Royal Society of Chemistry journal article supplement (doi:10.1039/c9ra04495g), 2019-01-01
Supplement: c9ra04495g1.pdf [file c9ra04495g1.pdf]

## SUPPORTING INFORMATION

# The Enzyme-like Catalytic Hydrogen Abstraction Reaction Mechanisms of Cyclic Hydrocarbons with Magnesium-Diluted Fe-MOF-74

Wen-zhi Luo,<sup>a</sup> Guang-hui Chen,<sup>\*a</sup> Song-tao Xiao,<sup>\*b</sup> Qiang Wang,<sup>c</sup> Ze-kun Huang,<sup>d</sup> Ling-Yu Wang<sup>b</sup>

*a. Department of Chemistry, Shantou University, Guangdong 515063, China. E-mail: [ghchen@stu.edu.cn](mailto:ghchen@stu.edu.cn)*

*b. Institute of Radiochemistry, China Institute of Atomic Energy (CIAE), Beijing, 102413, People's Republic of China. E-mail: [xiao200112@163.com](mailto:xiao200112@163.com)*

*c. Department of Applied Chemistry, College of Science, Nanjing Tech University, Nanjing 211816, People's Republic of China.*

*d. The Wolfson Department of Chemical Engineering, Israel Institute of Technology.*

**Table S1.** Comparison of Fe-O bond lengths ( $\text{\AA}$ ) of Fe/(Mg)-MOF-74 using B3LYP-D3 and M06-L-D3 methods.

| Project<br>Bond   | EXP <sup>a</sup> | B3LYP-D3 | Relative Error | M06-L-D3 | Relative Error |
|-------------------|------------------|----------|----------------|----------|----------------|
| Fe-O <sub>1</sub> | 2.067            | 2.064    | -0.15%         | 2.065    | -0.10%         |
| Fe-O <sub>2</sub> | 2.166            | 2.168    | 0.10%          | 2.169    | 0.14%          |
| Fe-O <sub>3</sub> | 2.077            | 2.070    | -0.34%         | 2.075    | -0.10%         |
| Fe-O <sub>4</sub> | 2.022            | 2.016    | -0.30%         | 2.017    | -0.25%         |
| Fe-O <sub>5</sub> | 2.054            | 2.052    | -0.10%         | 2.053    | -0.05%         |

<sup>a</sup> Parameters obtained from crystal structure of Fe/(Mg)-MOF-74.

**Table S2.** The Calculated  ${}^5\Delta H$ ,  ${}^3\Delta H$ ,  ${}^5\Delta G$ ,  ${}^3\Delta G$  for various species of the oxidation reaction of CHD catalyzed by Fe(Mg)-MOF-74.

| project                   | species | <b>A+N<sub>2</sub>O</b><br><b>+CHD</b> | <b>B</b> | <b>TS1</b> | <b>C</b> | <b>D</b> | <b>TS2</b> | <b>E</b> | <b>F</b> | <b>TS3</b> | <b>G</b> | <b>A+N<sub>2</sub>+</b> |
|---------------------------|---------|----------------------------------------|----------|------------|----------|----------|------------|----------|----------|------------|----------|-------------------------|
|                           |         |                                        |          |            |          |          |            |          |          |            |          | <b>H<sub>2</sub>O+b</b> |
| ${}^5\Delta H$ (kcal/mol) |         | 0.0                                    | -8.5     | 10.9       | -24.1    | -33.7    | -30.2      | -53.8    | -56.1    | -50.9      | -88.4    | -62.8                   |
| ${}^3\Delta H$ (kcal/mol) |         | 31.2                                   | 29.0     | 32.4       | -5.2     | -14.5    | -9.8       | -34.1    | -35.6    | -27.7      | -61.7    | -31.6                   |
| ${}^5\Delta G$ (kcal/mol) |         | 0.0                                    | 0.6      | 20.4       | -17.0    | -21.9    | -17.5      | -42.6    | -45.1    | -39.1      | -78.5    | -73.1                   |
| ${}^3\Delta G$ (kcal/mol) |         | 31.6                                   | 38.3     | 43.1       | 1.6      | -2.2     | 4.7        | -22.4    | -23.8    | -14.3      | -50.3    | -41.5                   |

**Table S3.** The Calculated  ${}^5\Delta H$  and  ${}^5\Delta G$  for various species of the oxidation reaction of CHA catalyzed by Fe(Mg)-MOF-74.

| project \ species         | H                         | TS4 | I    | TS5  | J     |
|---------------------------|---------------------------|-----|------|------|-------|
|                           | ${}^5\Delta H$ (kcal/mol) | 0.0 | 8.1  | -5.2 | -4.3  |
| ${}^5\Delta G$ (kcal/mol) | 0.0                       | 9.2 | -5.0 | -4.0 | -32.2 |

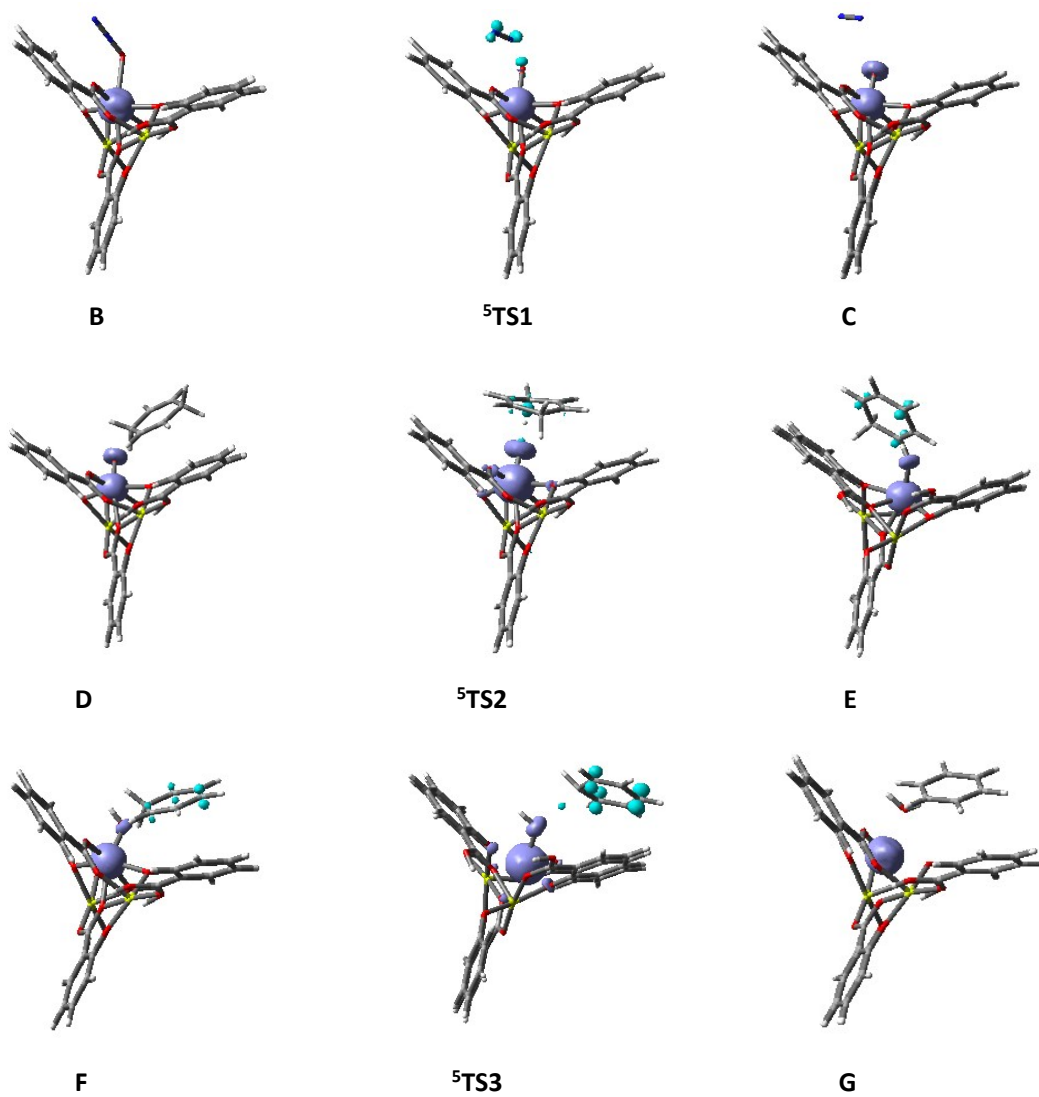

Fig. S1. The calculated spin density distribution of <sup>5</sup>TS1, <sup>5</sup>TS2, <sup>5</sup>TS3 and B~G species.

Spin Natural Orbitals of  ${}^5\mathbf{A-O}$

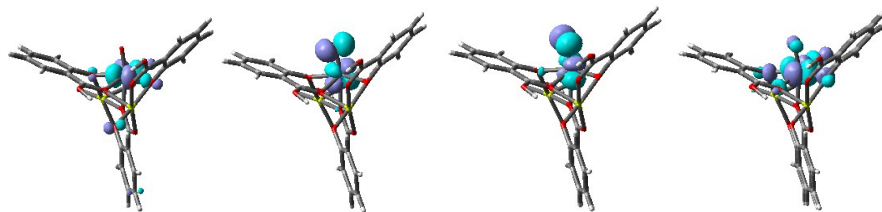

$\delta$

(1.00 e)

$\pi^*$

(1.00 e)

$\pi^*$

(1.00 e)

$\sigma_{xy}^*$

(1.00 e)

Natural Orbitals of  ${}^5\mathbf{A-O}$

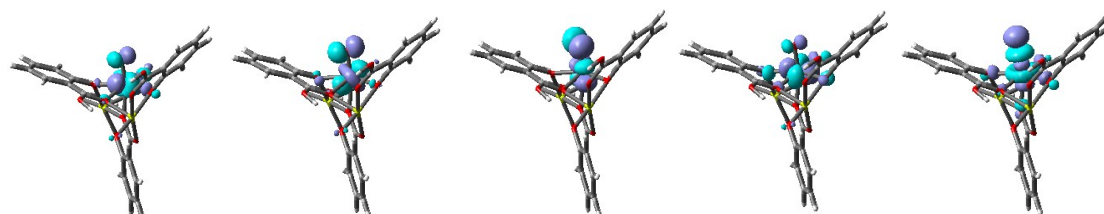

$\delta$

(1.00 e)

$\pi^*$

(1.00 e)

$\pi^*$

(1.00 e)

$\sigma_{xy}^*$

(1.00 e)

$\sigma_z^{*2}$

(0.00 e)

(a)

Spin Natural Orbitals of  ${}^3\text{A-O}$

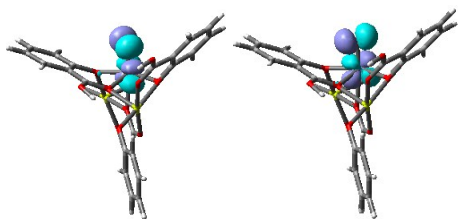

$\pi^*$

(1.00 e)

$\pi^*$

(1.00 e)

Natural Orbitals of  ${}^3\text{A-O}$

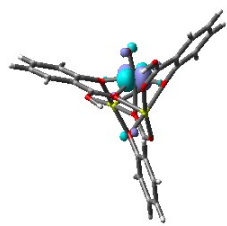

$\delta$

(2.00 e)

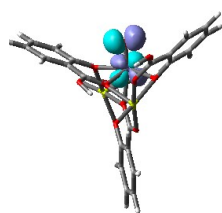

$\pi^*$

(1.00 e)

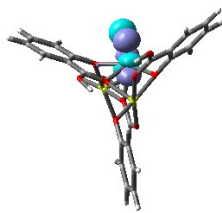

$\pi^*$

(1.00 e)

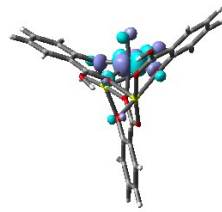

$\sigma_{xy}^*$

(0.00 e)

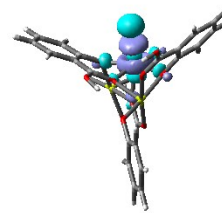

$\sigma_z^{*2}$

(0.00 e)

(b)

Spin Natural Orbitals of  ${}^5\text{TS2}$

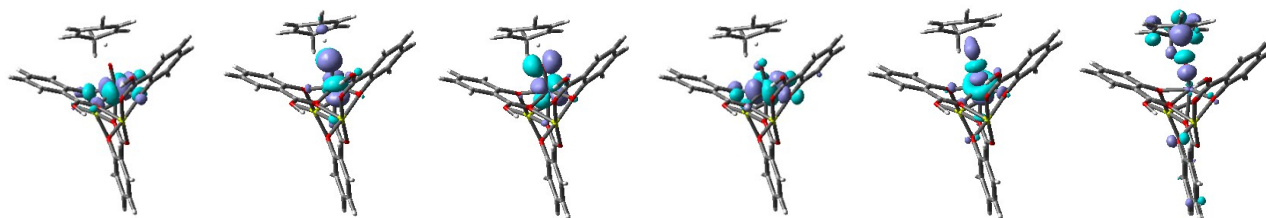

|          |          |          |                 |                 |                |
|----------|----------|----------|-----------------|-----------------|----------------|
| $\delta$ | $\pi^*$  | $\pi^*$  | $\sigma_{xy}^*$ | $\sigma_z^{*2}$ | $\phi_C+2P(O)$ |
| (1.00 e) | (1.00 e) | (1.00 e) | (1.00 e)        | (0.70 e)        | (-0.70 e)      |

Natural Orbitals of  ${}^5\text{TS2}$

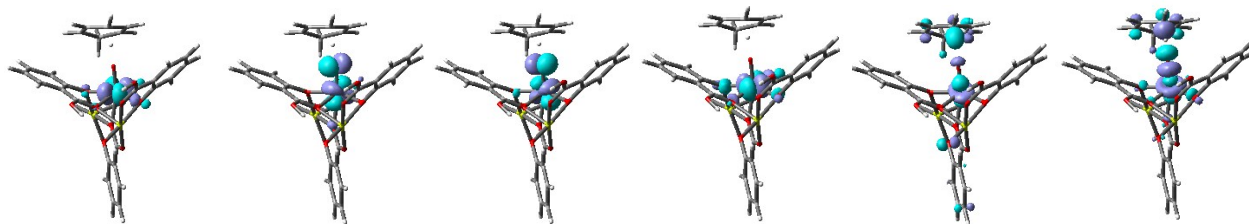

|          |          |          |                 |                        |                        |
|----------|----------|----------|-----------------|------------------------|------------------------|
| $\delta$ | $\pi^*$  | $\pi^*$  | $\sigma_{xy}^*$ | $\phi_C+\sigma_z^{*2}$ | $\phi_C+\sigma_z^{*2}$ |
| (1.00 e) | (1.00 e) | (1.00 e) | (1.00 e)        | (1.77 e)               | (0.23 e)               |

(c)



### Spin Natural Orbitals of ${}^3\text{TS2}$

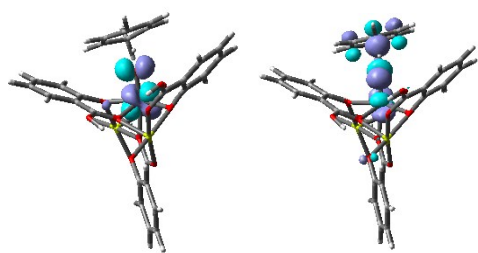

$\pi^*$

(1.00 e)

$\pi^* + \phi_C$

(1.00 e)

### Natural Orbitals of ${}^3\text{TS2}$

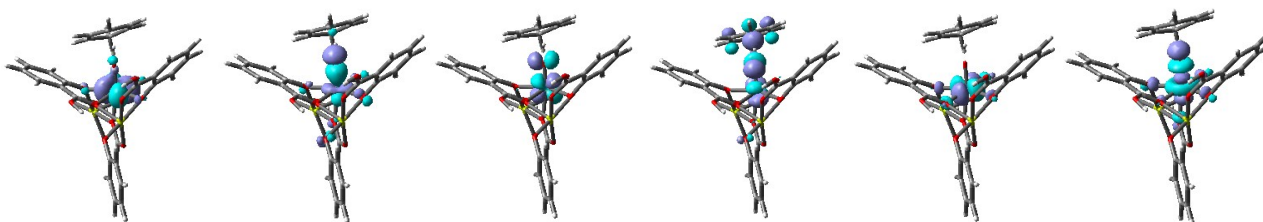

$\delta$

(2.00 e)

$d_{yz}$

(2.00 e)

$\pi^*$

(1.00 e)

$\pi^* + \phi_C$

(1.00 e)

$\sigma_{xy}^*$

(0.00 e)

$\sigma_z^{*2}$

(0.00 e)

(d)

**Fig. S2.** The calculated spin natural orbitals, natural orbitals and their occupations of (a)  ${}^5\text{A-O}$ ; (b)  ${}^3\text{A-O}$ ; (c)  ${}^5\text{TS2}$ ; and (d)  ${}^3\text{TS2}$  for the first hydrogen abstraction reaction. The negative occupation in  $\phi_C$  denotes  $\beta$  spin electron.
